# Supplementary material for: BRD9 degraders as chemosensitizers in acute leukemia and multiple myeloma
Source: PubMed Central journal article supplement (PMC9296512; doi:10.1038/s41408-022-00704-7), 2022-07-19

# Supplementary Figure 1

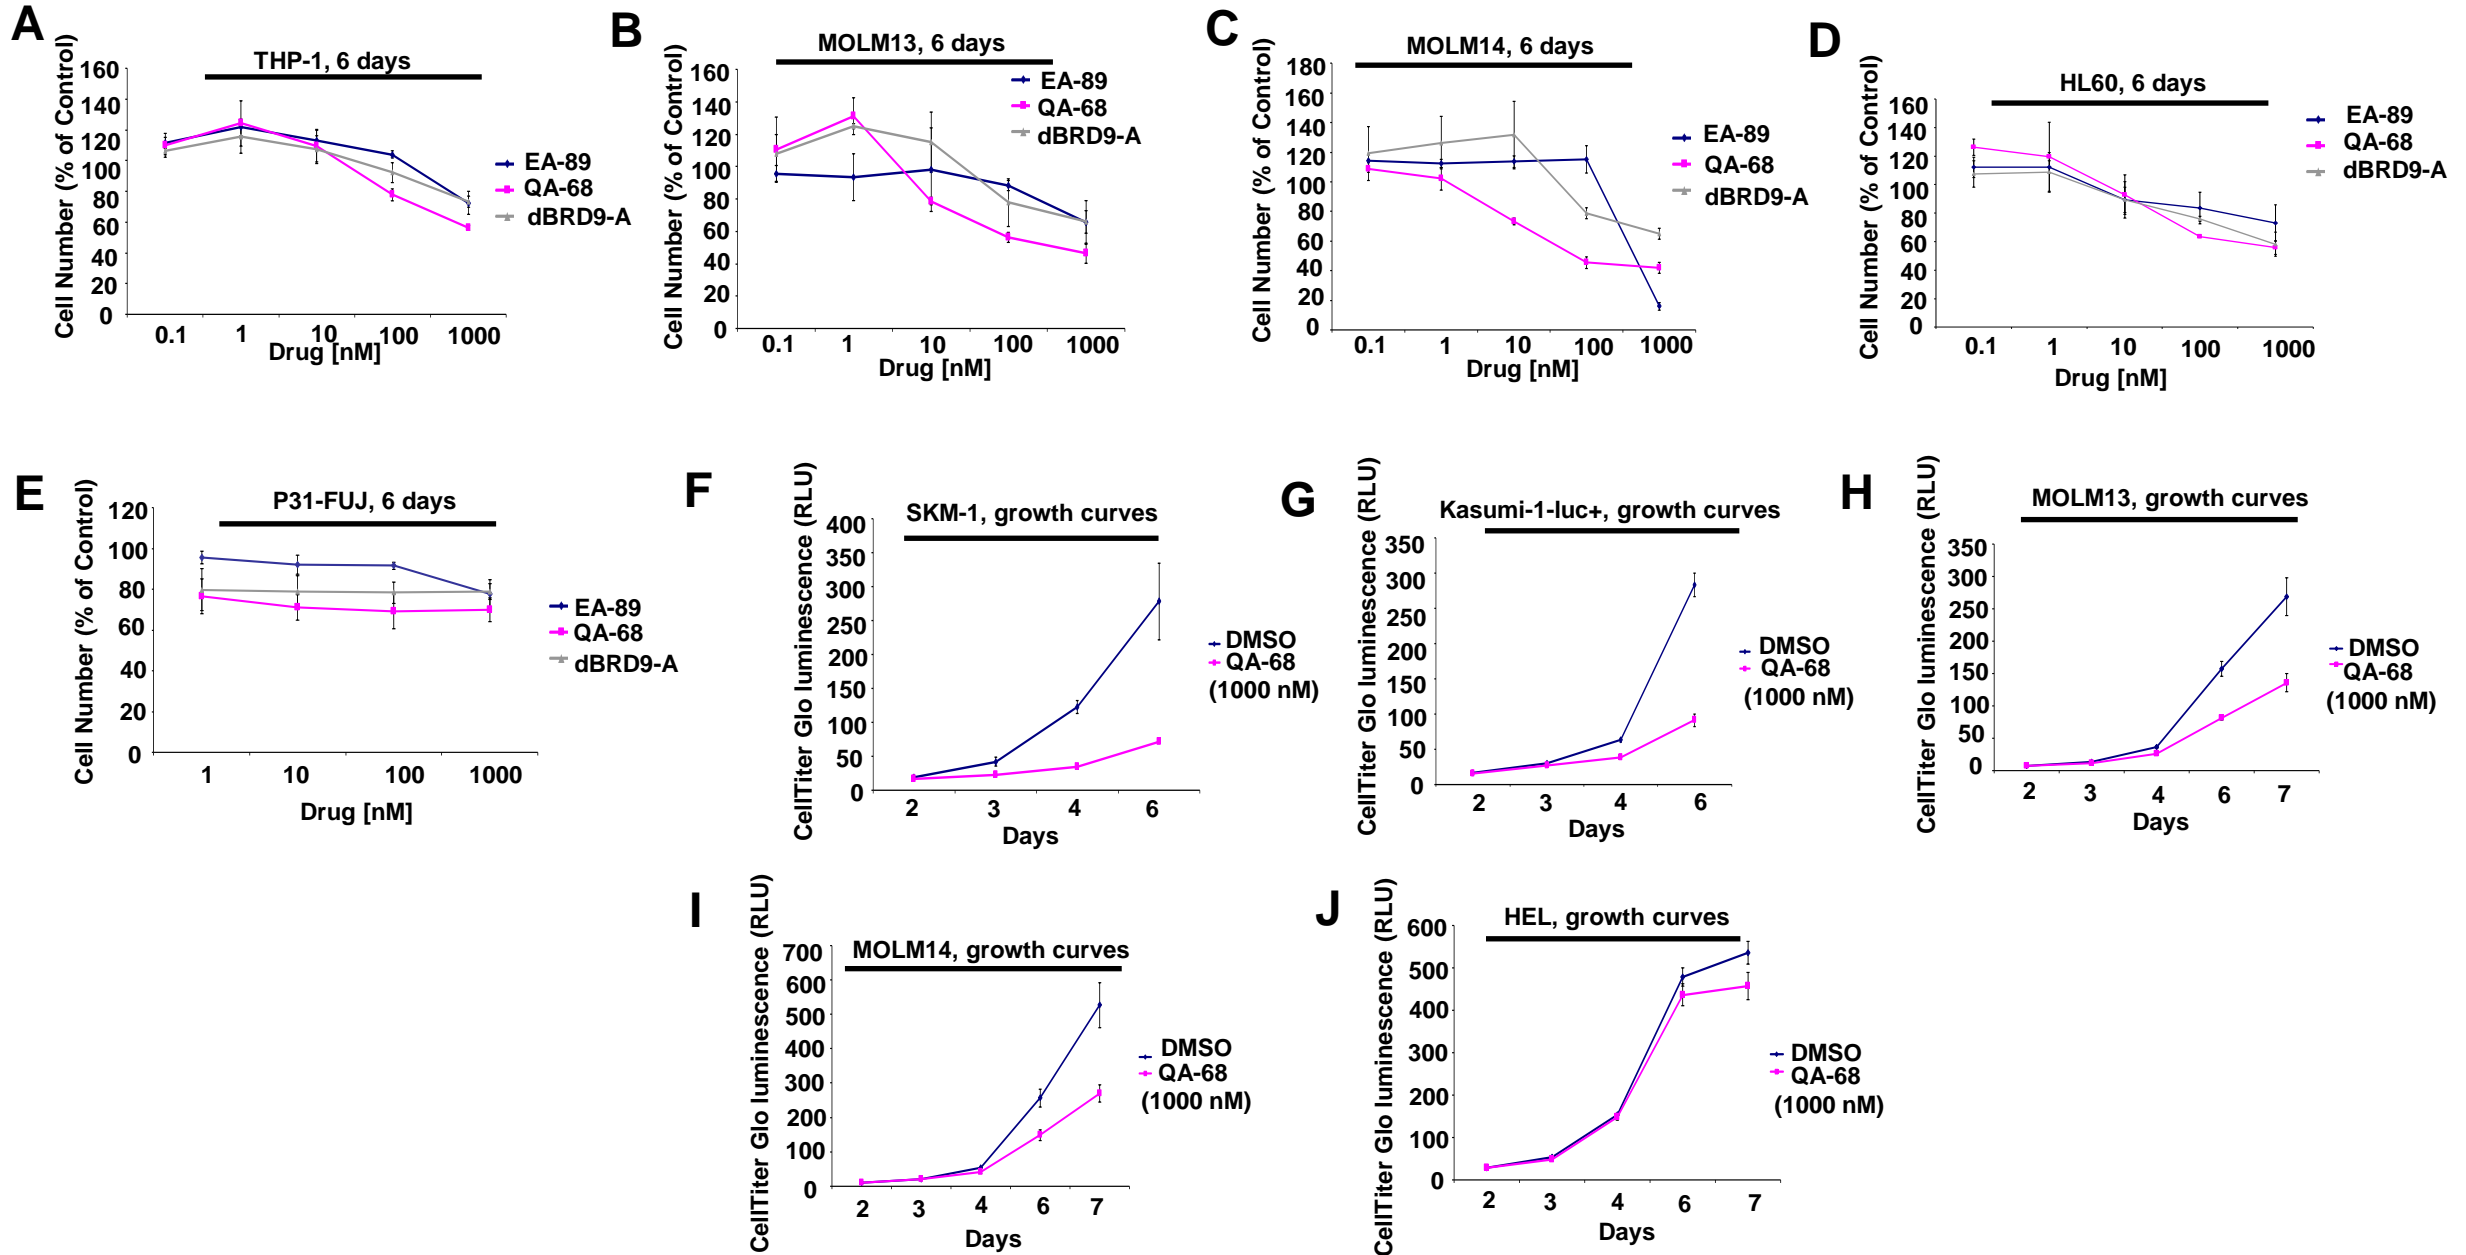

# Supplementary Figure 2

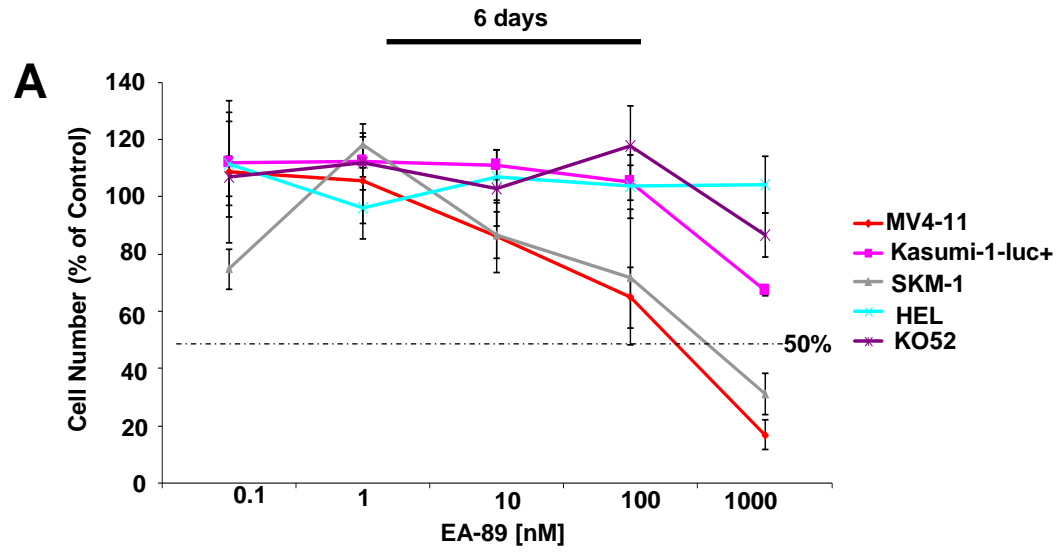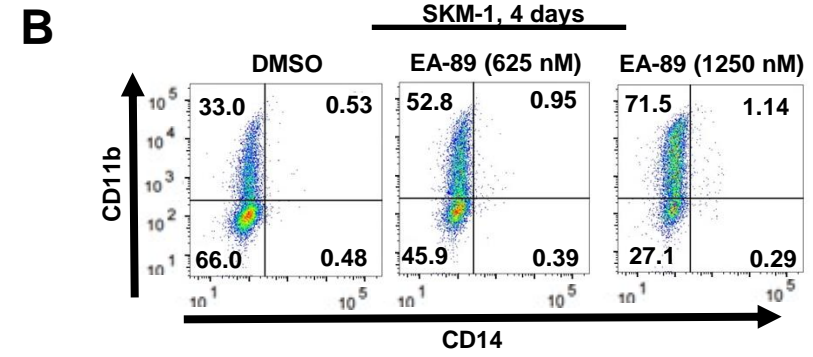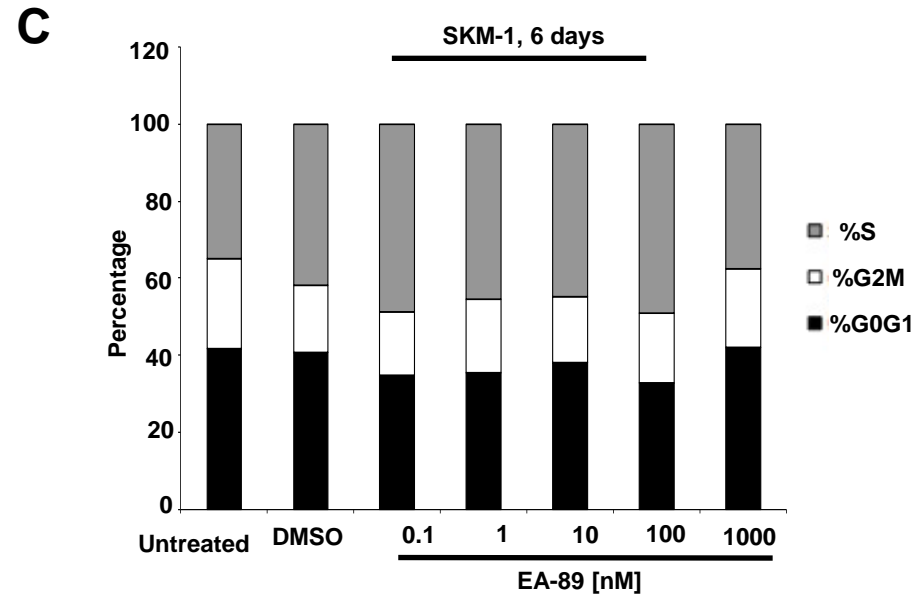

**A****SKM-1, 6 days**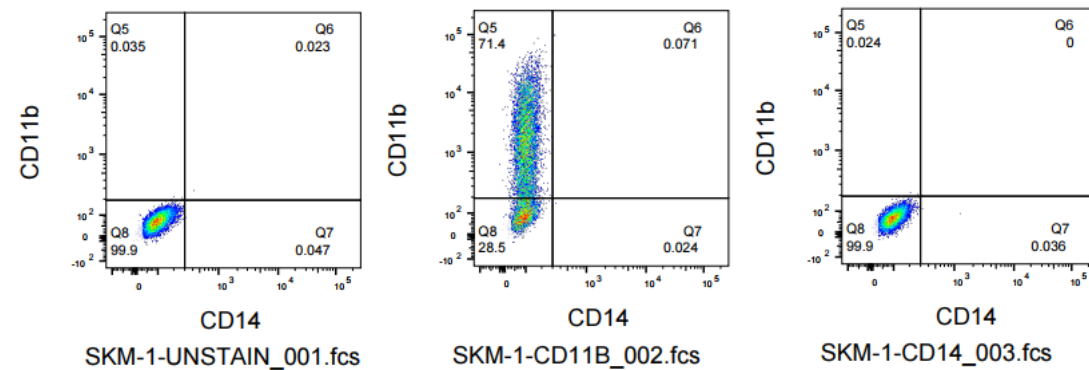**QA-68**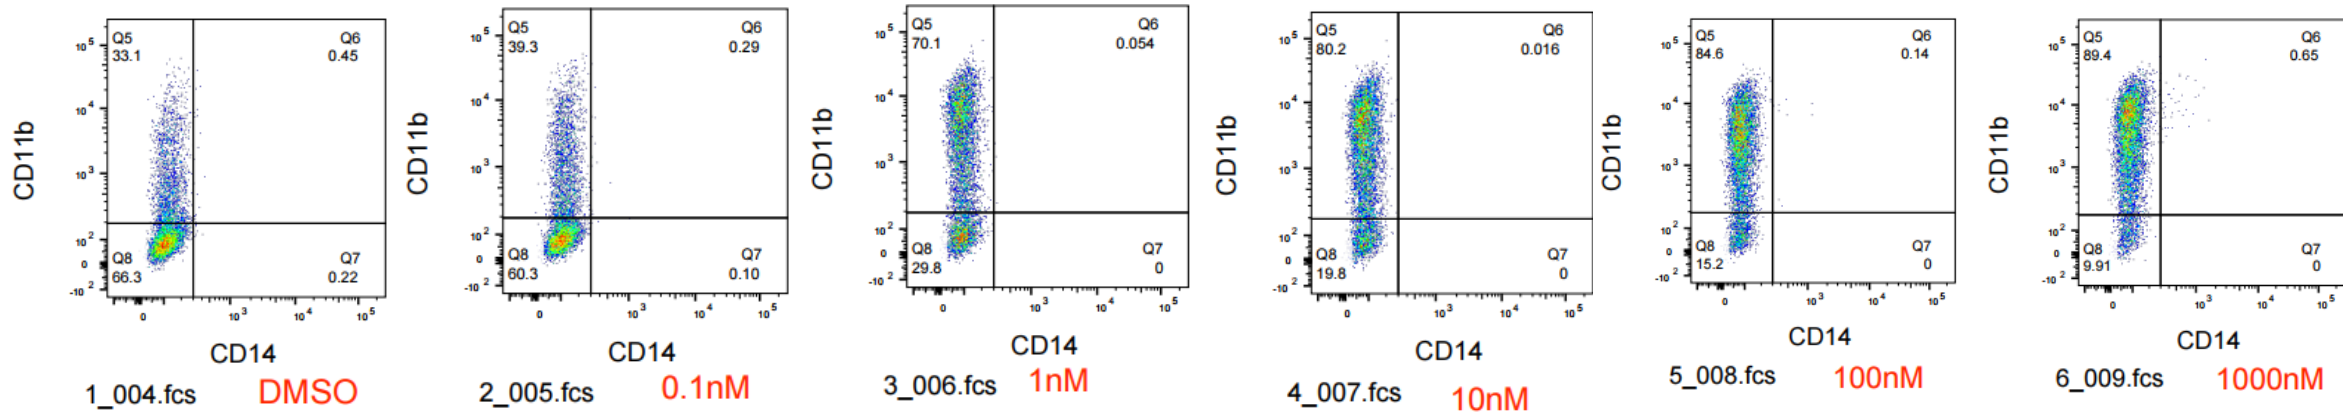**EA-89**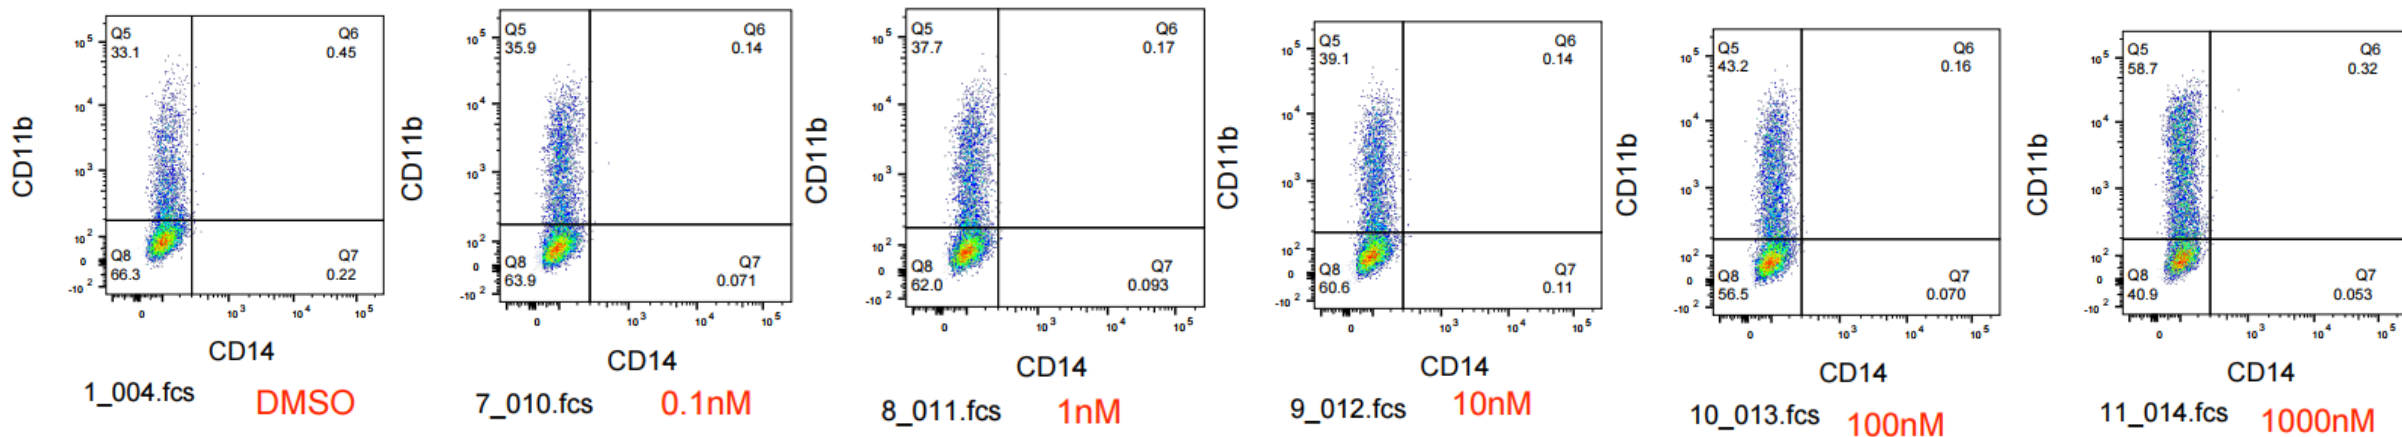**Supplementary Figure 3(A)**

**B**

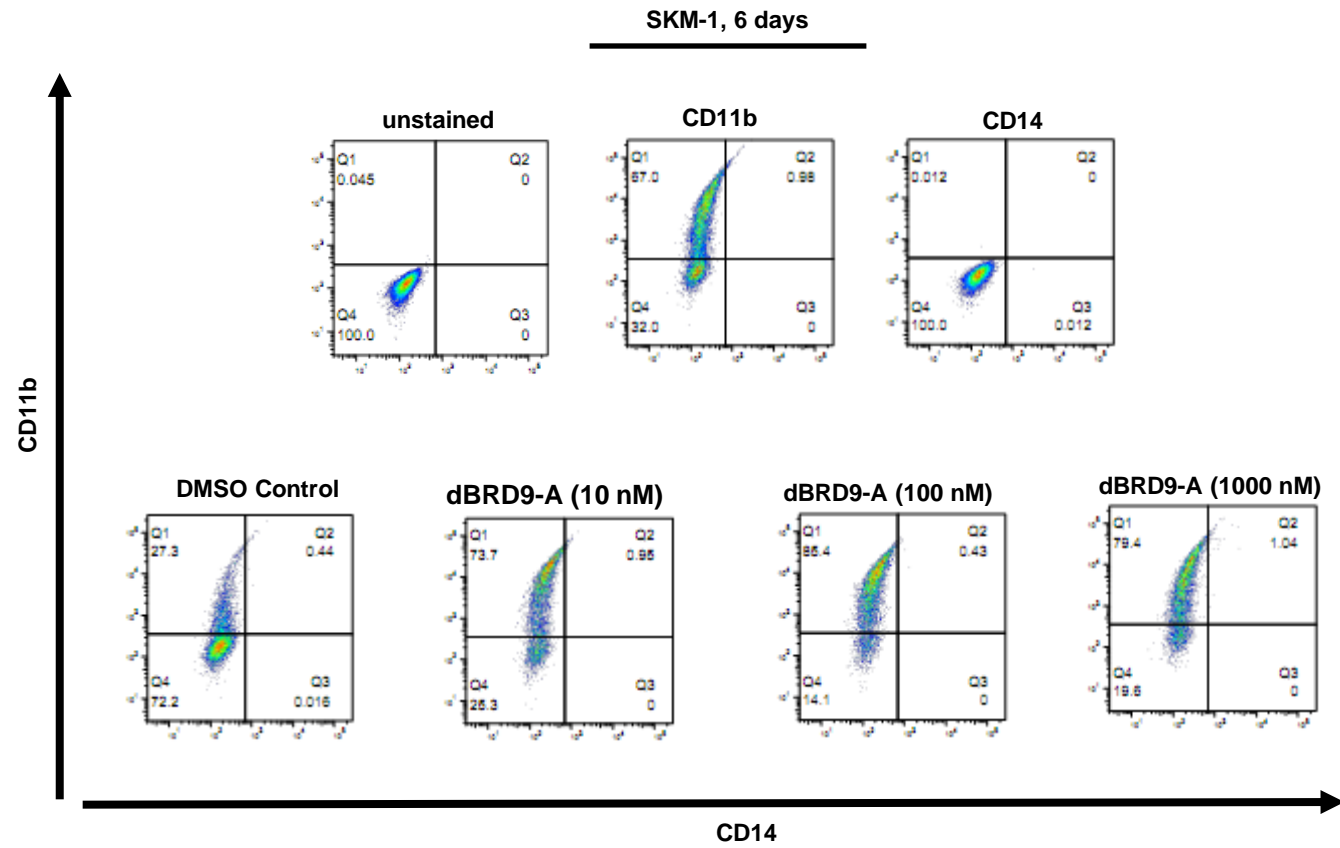

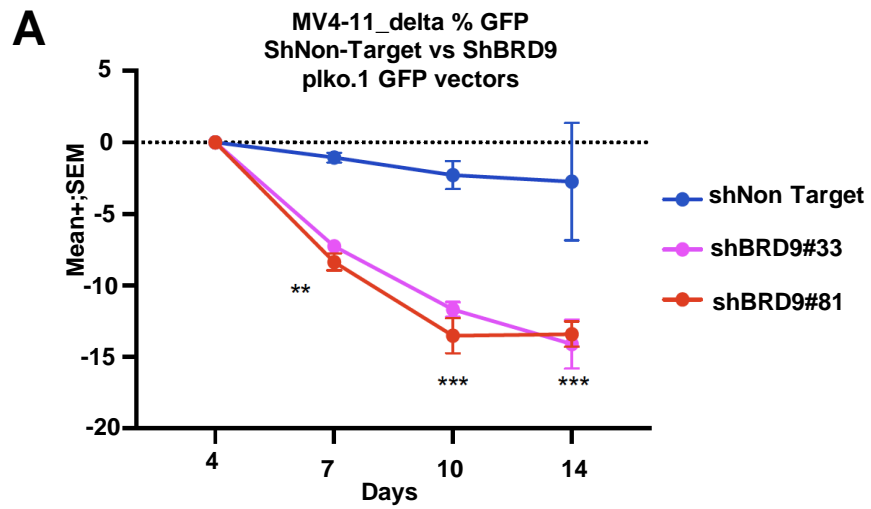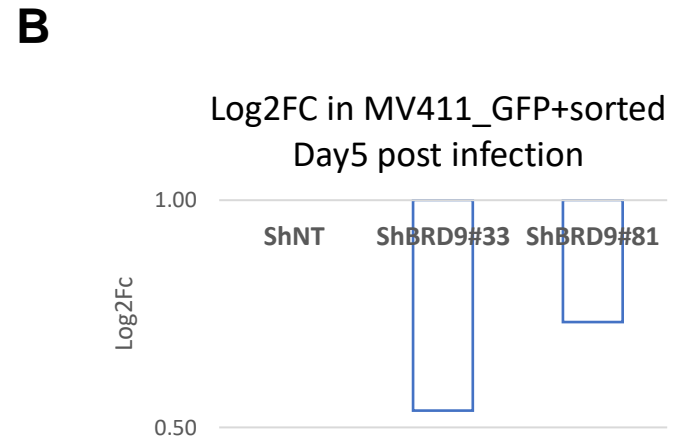

# Supplementary Figure 5

**A**
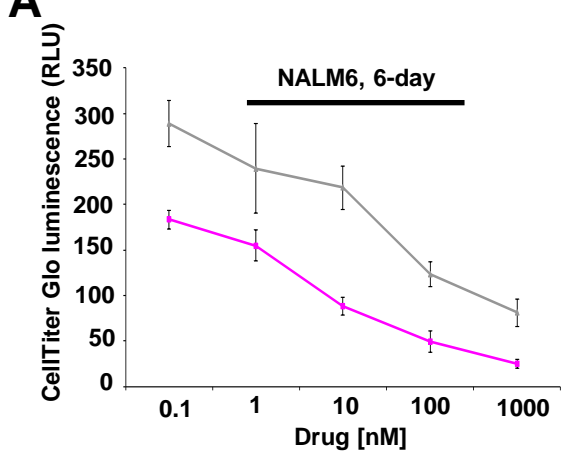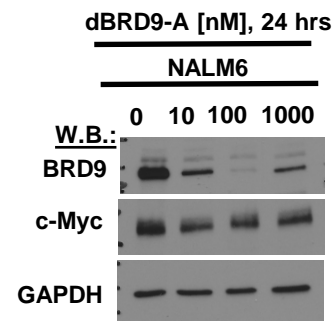
**D**
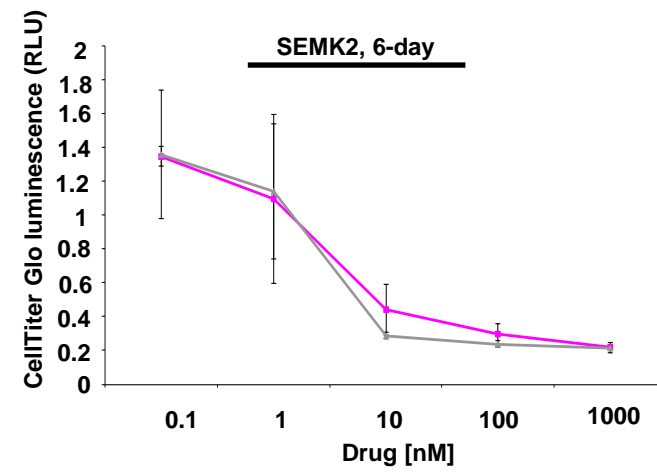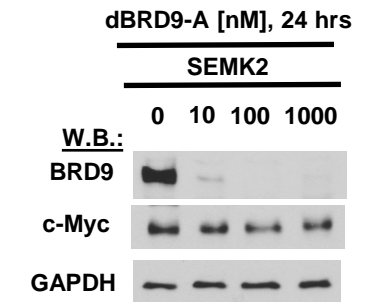
**B**
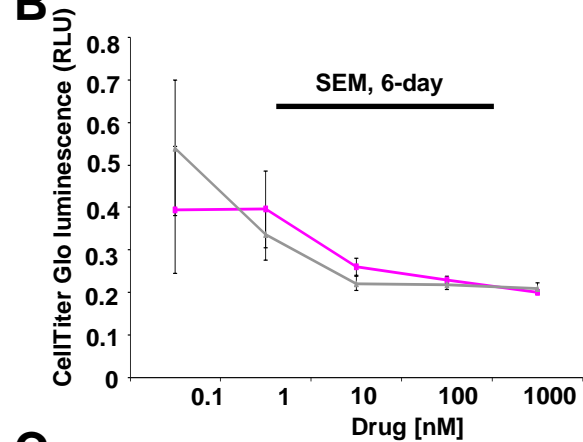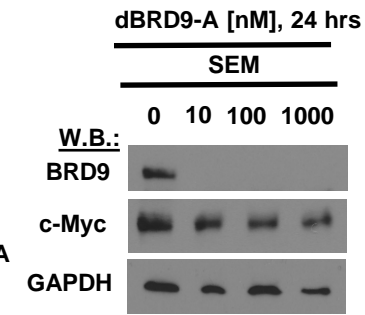
**E**
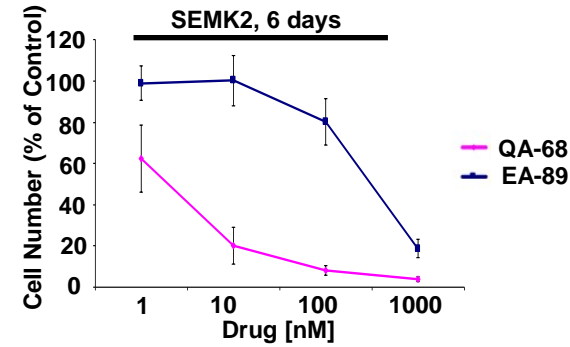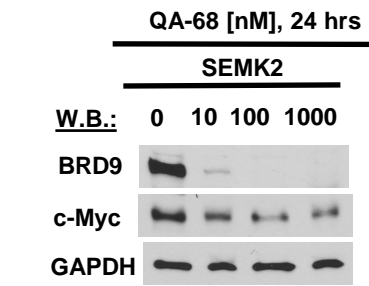
**C**
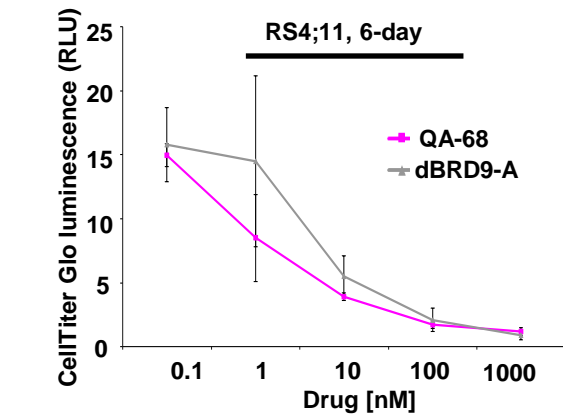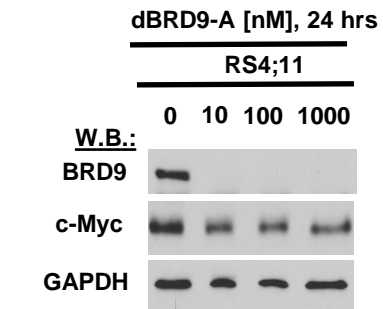
**F**
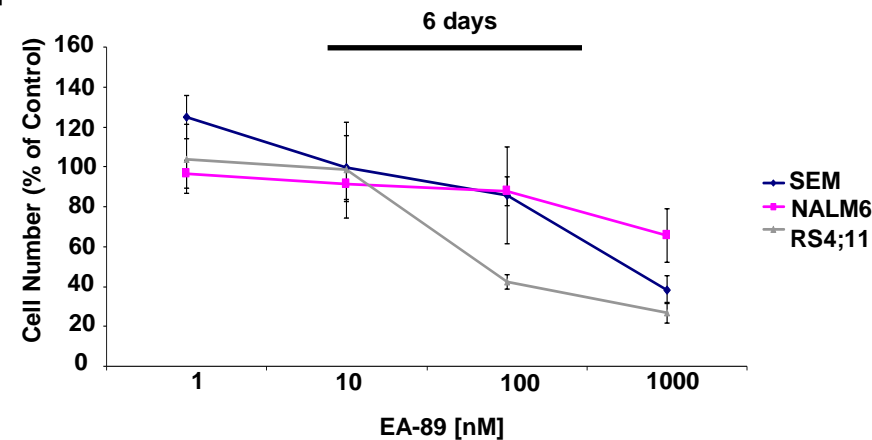

# Supplementary Figure 6 (A-D)

**A**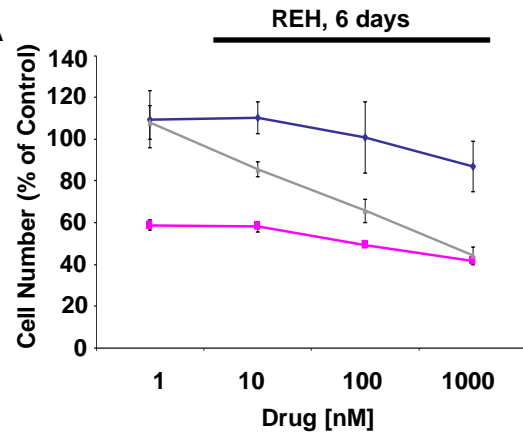**B**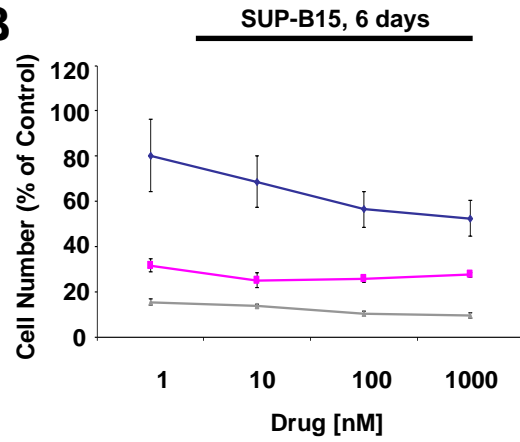**C**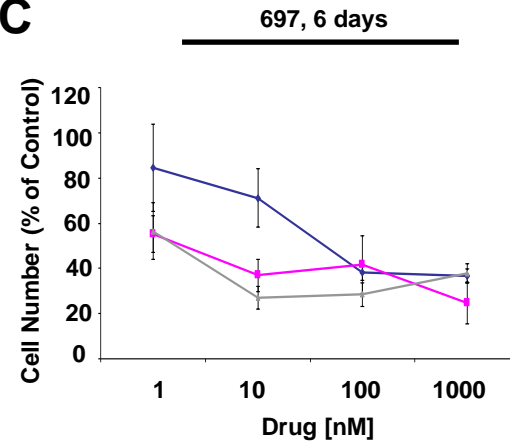**D**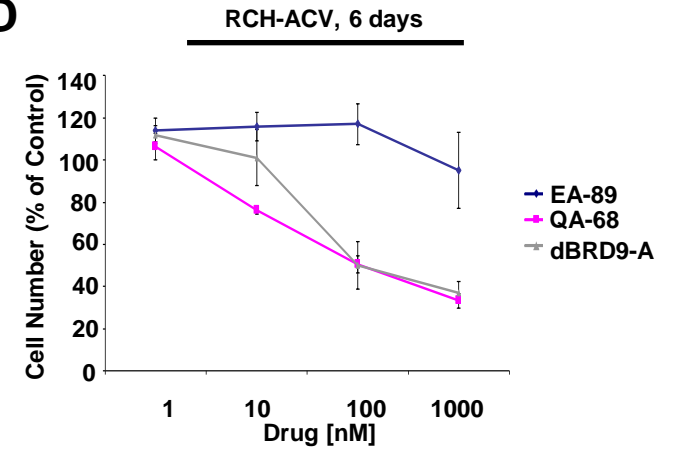

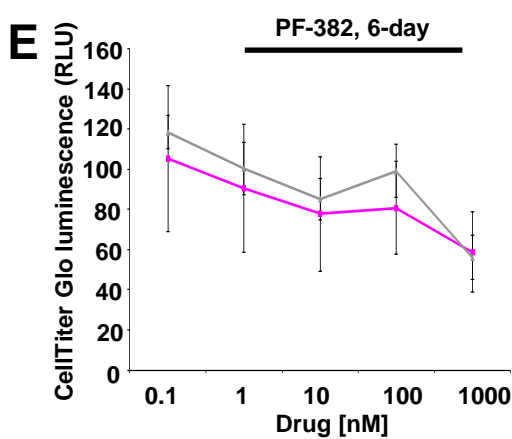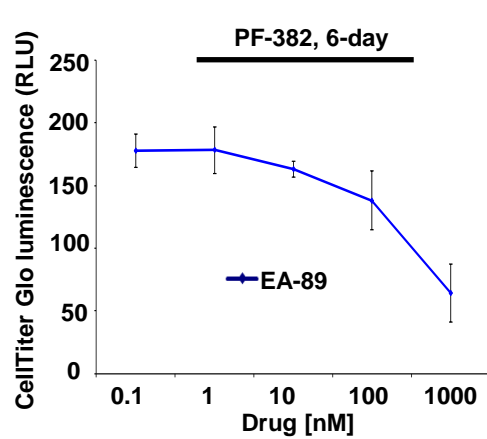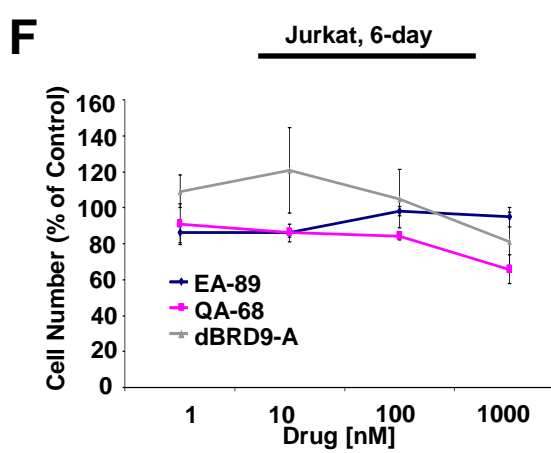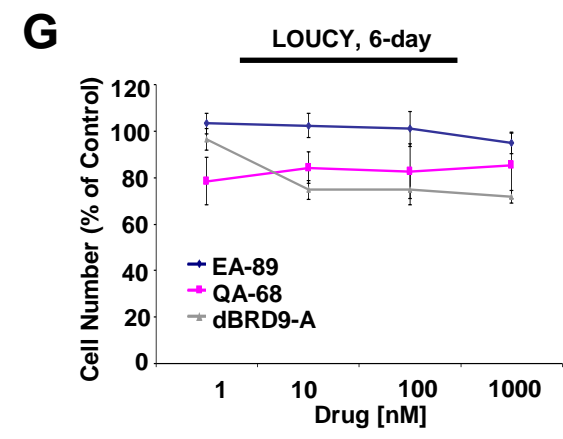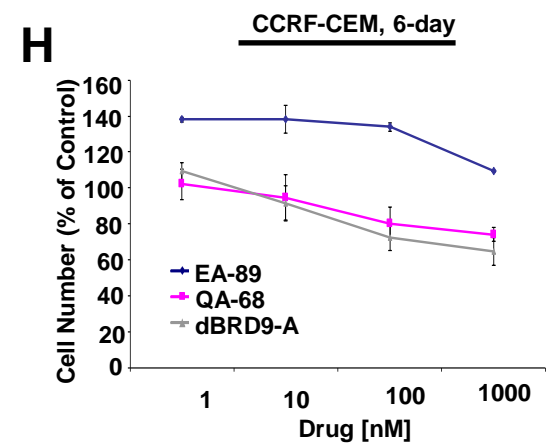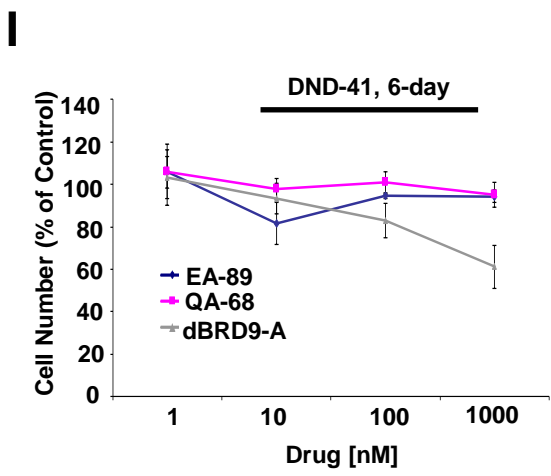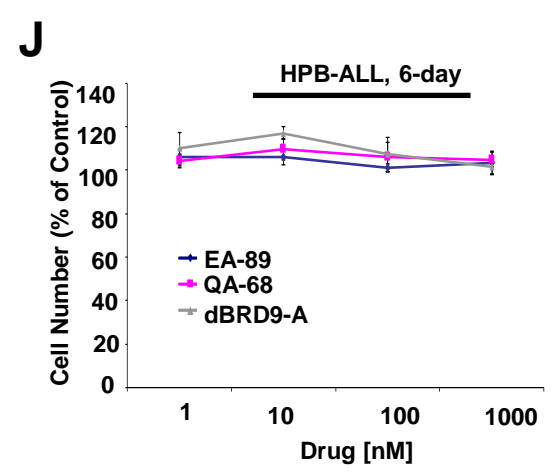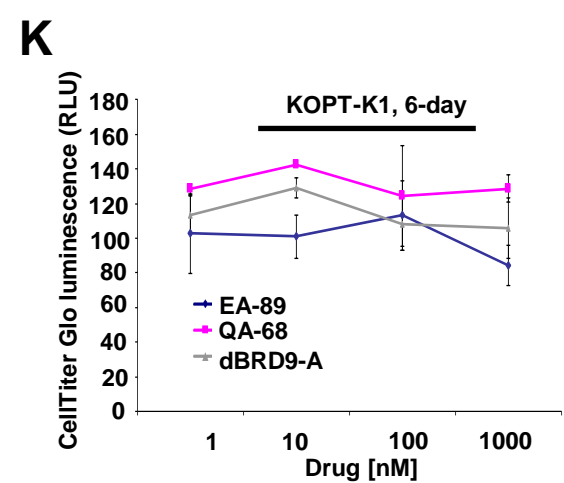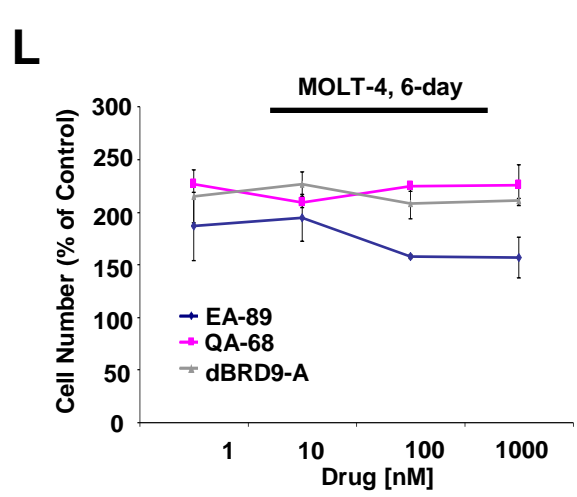

Supplementary Figure 6 (E-L)



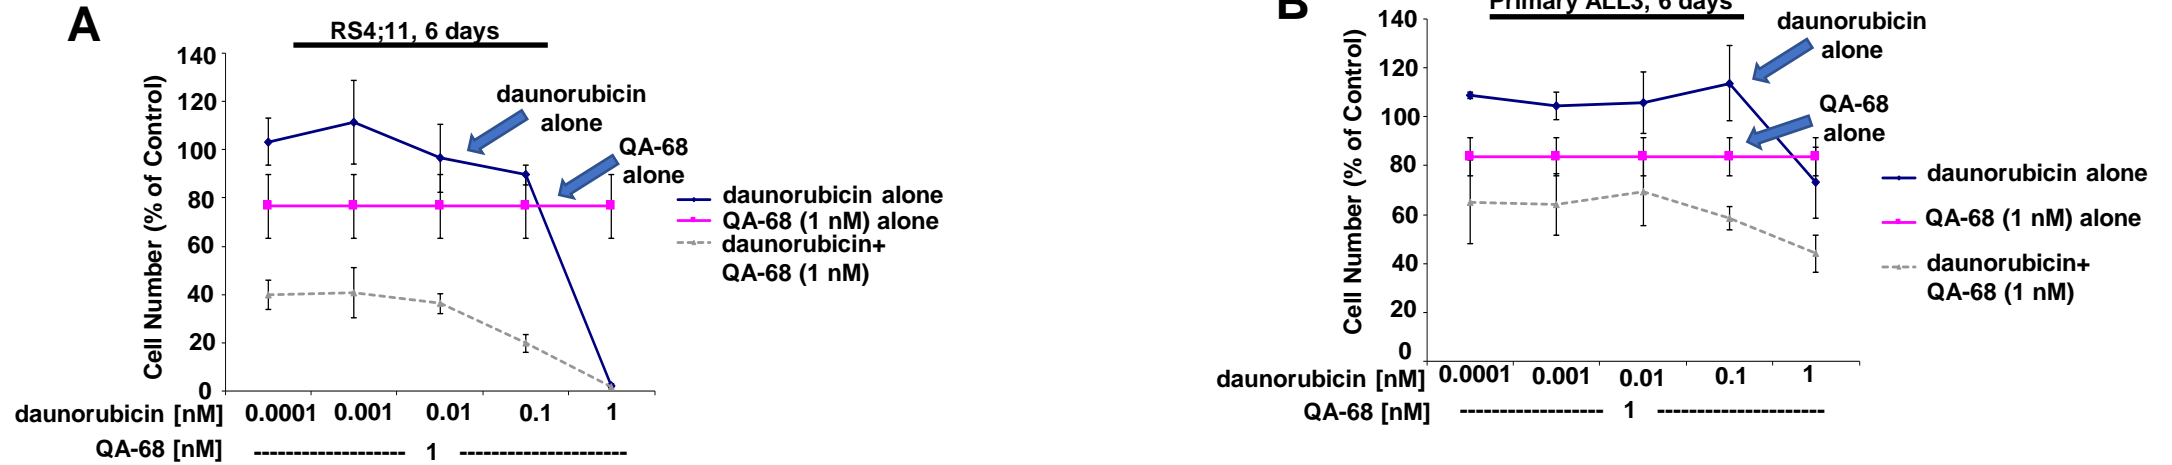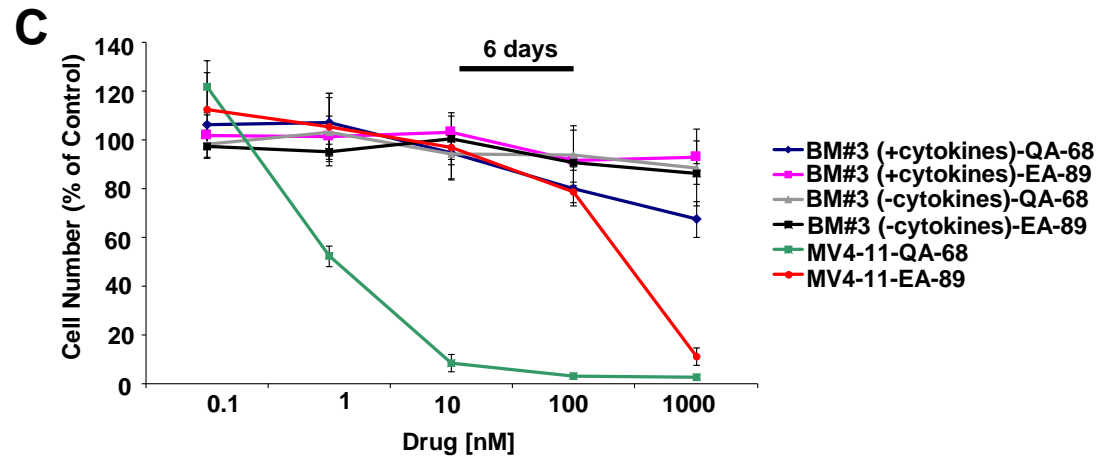

Supplementary Figure 7

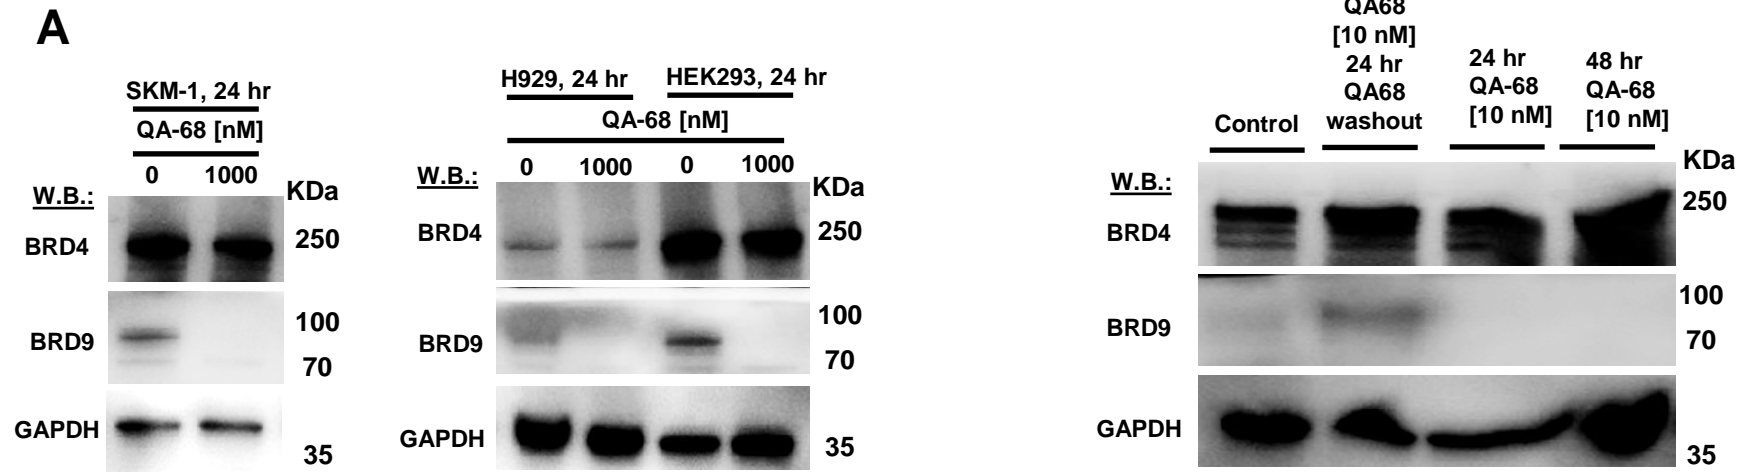

Supplementary Figure 8

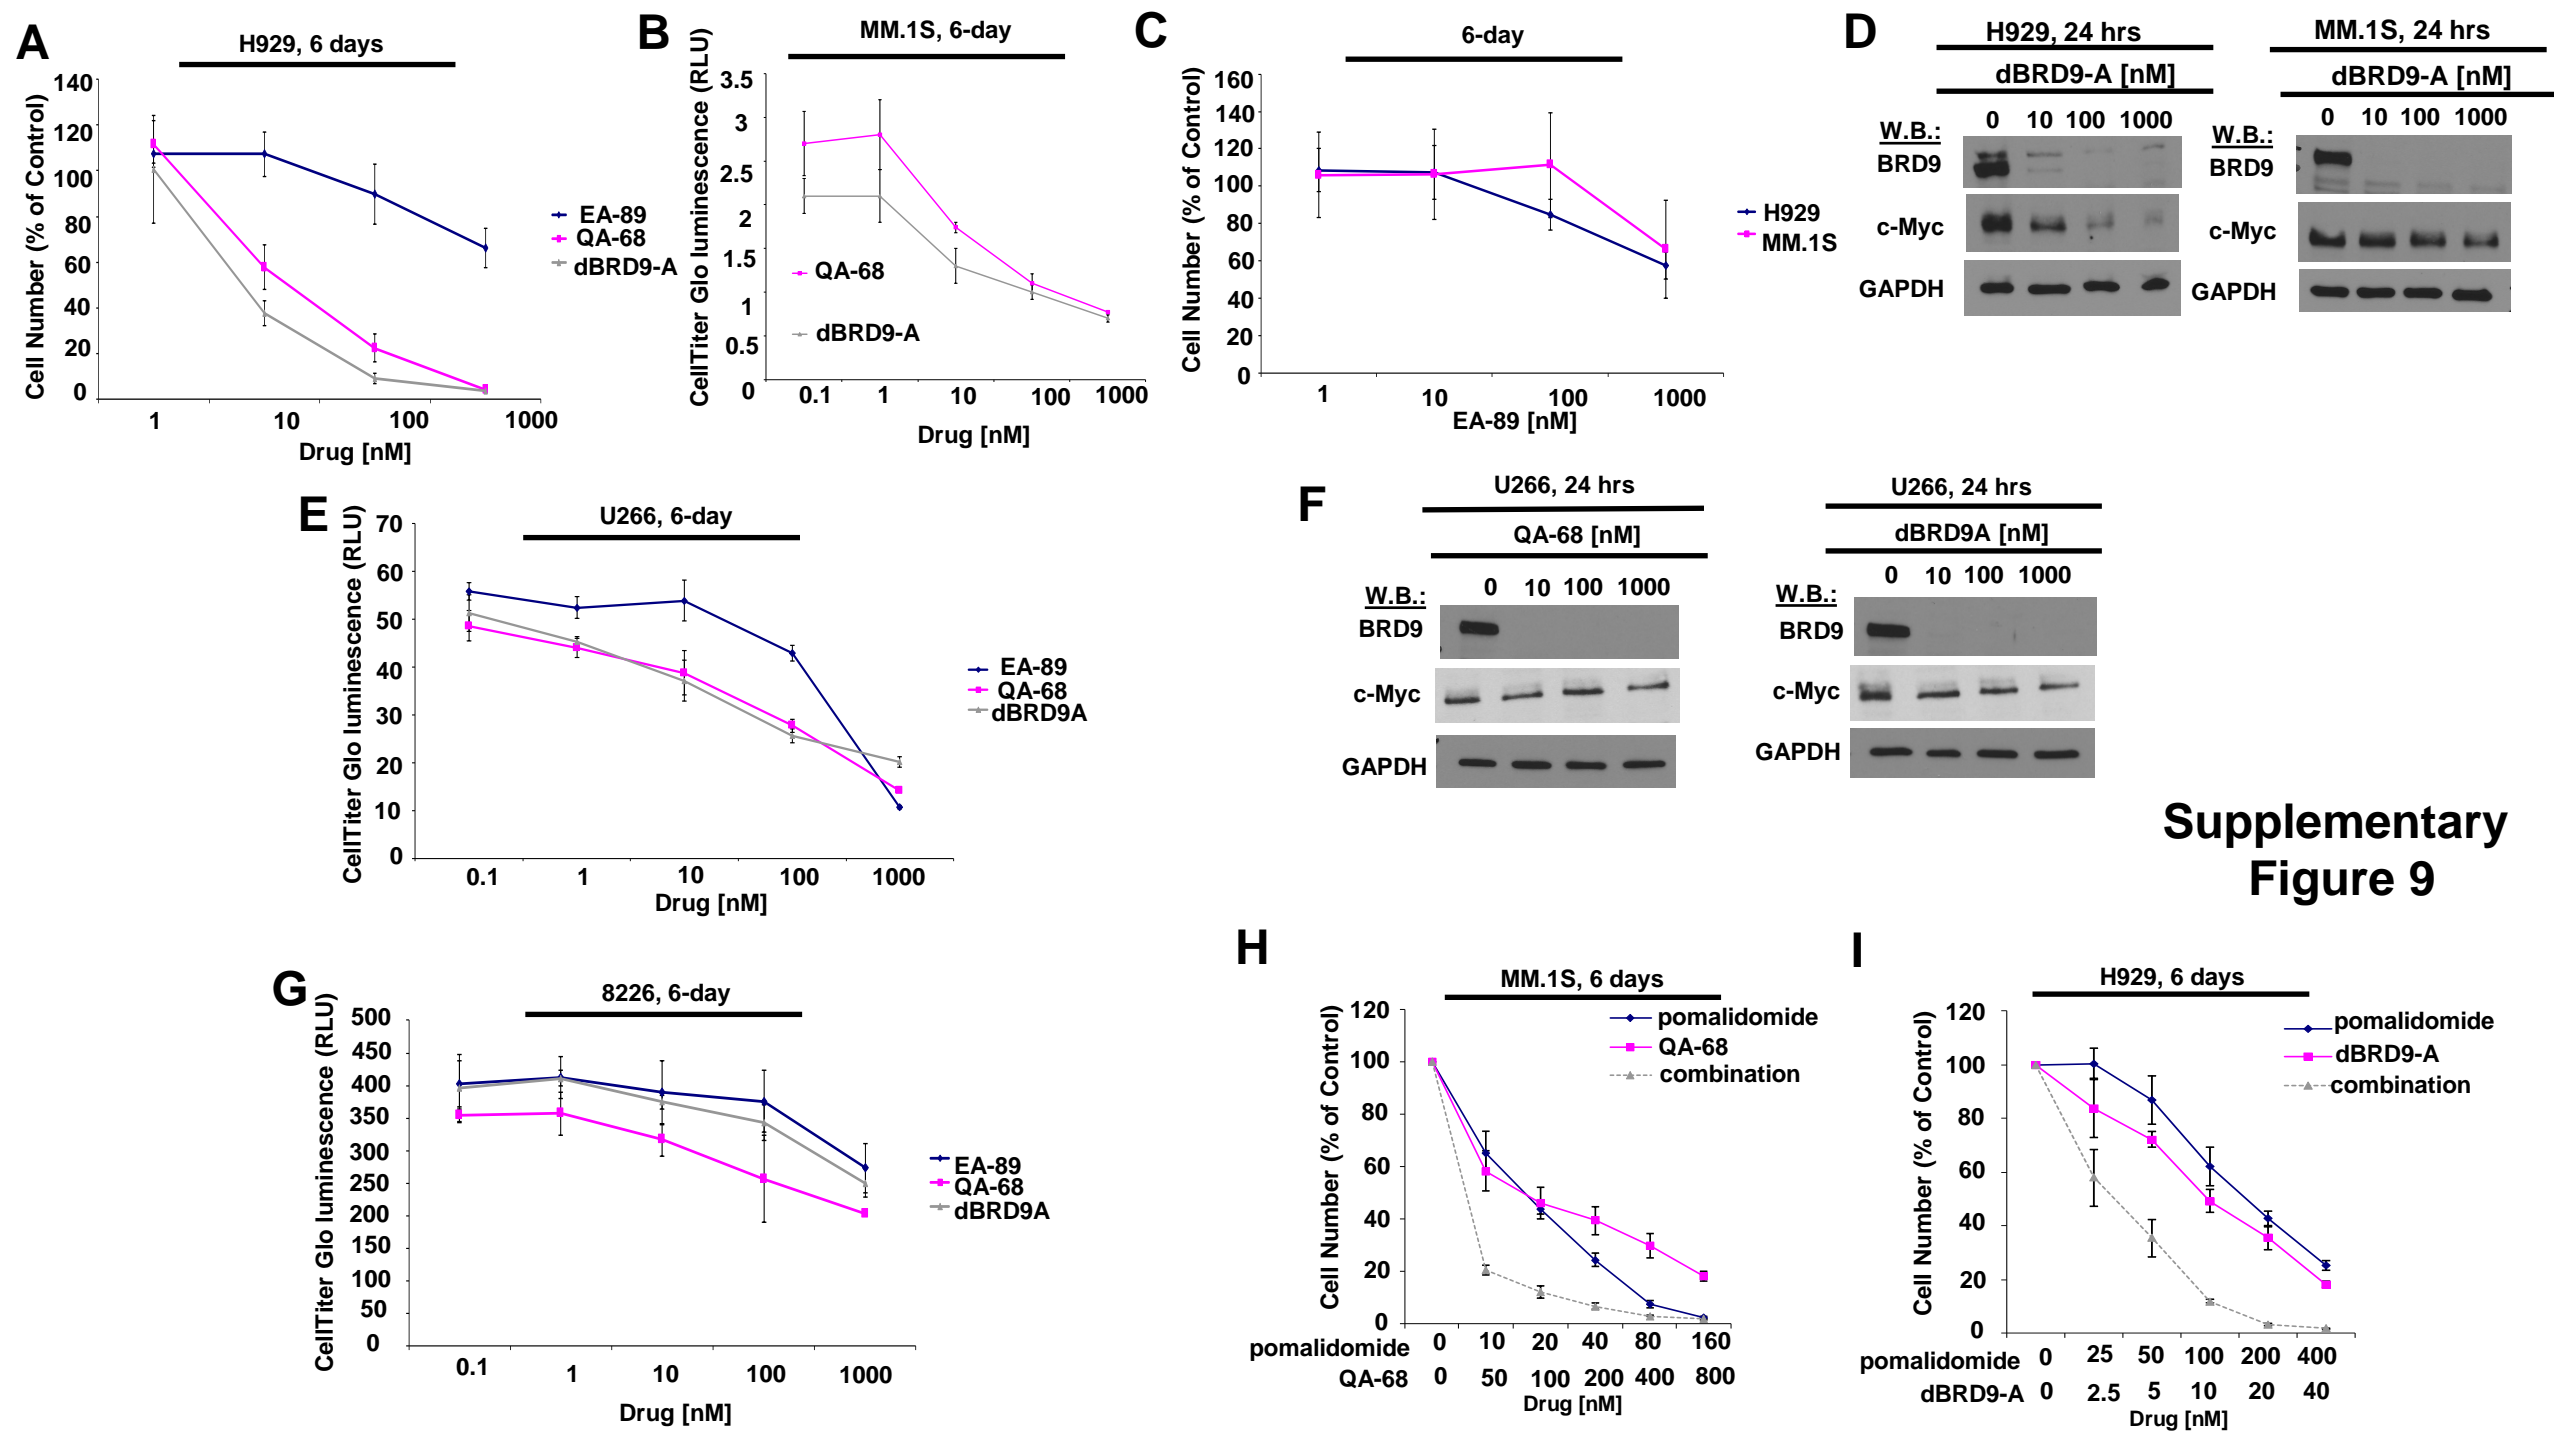

# Supplementary Figure 10

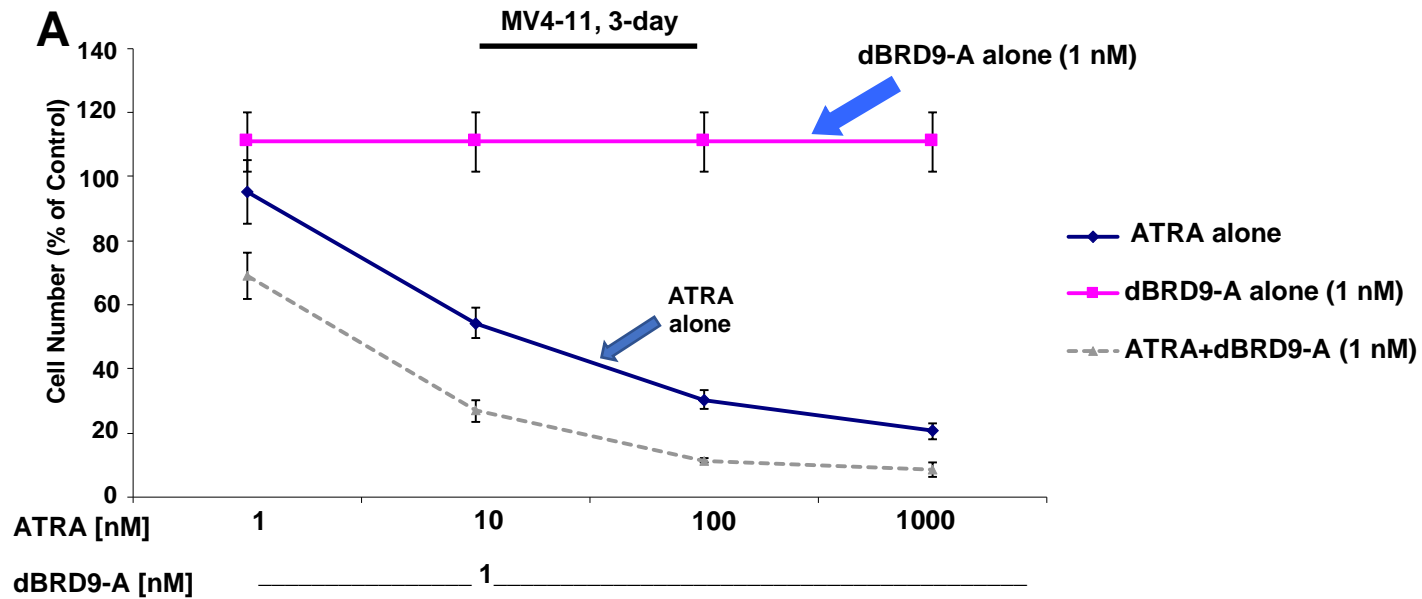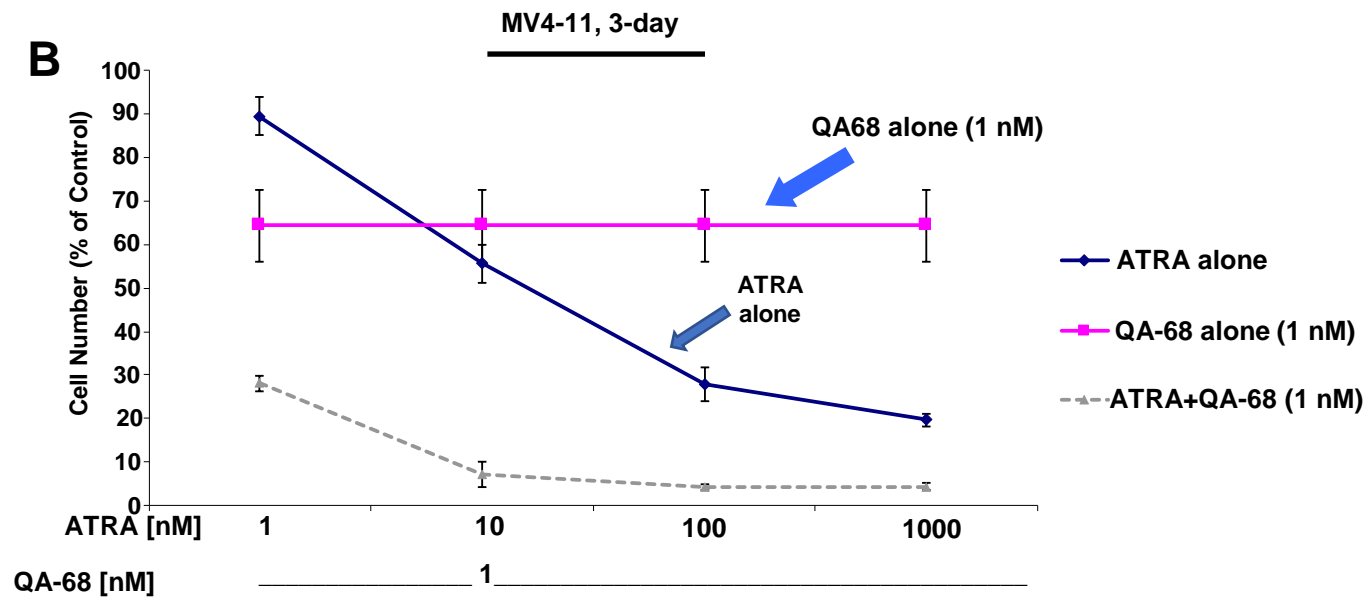

**SKM-1**

|                         |   | Treatment                            | CD11b |
|-------------------------|---|--------------------------------------|-------|
|                         |   | DMSO                                 | 38.7  |
|                         |   | QA68 (0.1 nM)                        | 45.8  |
|                         |   | decitabine (25 nM)                   | 64.4  |
| <b>Drug Combination</b> | ➔ | QA68 (0.1 nM)+decitabine (25 nM)     | 73.4  |
|                         |   | DMSO                                 | 38.7  |
|                         |   | QA68 (0.1 nM)                        | 45.8  |
|                         |   | 5-azacytidine (25 nM)                | 43.8  |
| <b>Drug Combination</b> | ➔ | QA68 (0.1 nM)+5-azacytidine (25 nM)  | 55.1  |
|                         |   | DMSO                                 | 38.7  |
|                         |   | QA68 (1 nM)                          | 84.5  |
|                         |   | venetoclax (625 nM)                  | 83.6  |
| <b>Drug Combination</b> | ➔ | QA68 (1 nM)+venetoclax (625 nM)      | 97.1  |
|                         |   | DMSO                                 | 38.7  |
|                         |   | EA89 (1000 nM)                       | 65.7  |
|                         |   | decitabine (25 nM)                   | 64.4  |
| <b>Drug Combination</b> | ➔ | EA89 (1000 nM)+decitabine (25 nM)    | 83.4  |
|                         |   | DMSO                                 | 38.7  |
|                         |   | EA89 (1000 nM)                       | 65.7  |
|                         |   | 5-azacytidine (25 nM)                | 43.8  |
| <b>Drug Combination</b> | ➔ | EA89 (1000 nM)+5-azacytidine (25 nM) | 61.1  |
|                         |   | DMSO                                 | 38.7  |
|                         |   | EA89 (1000 nM)                       | 65.7  |
|                         |   | venetoclax (625 nM)                  | 83.6  |
| <b>Drug Combination</b> | ➔ | EA89 (1000 nM)+venetoclax (625 nM)   | 92.9  |

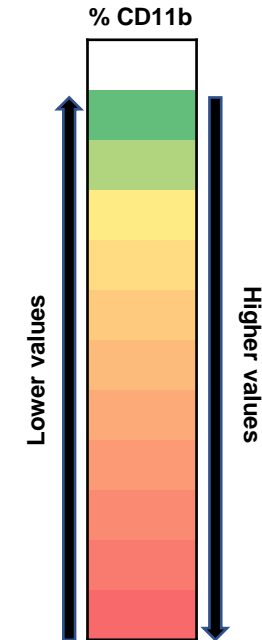

**Supplementary Figure 11**

**A** *MV411, Comparison of UP & DOWN reg DEGS between degraders*

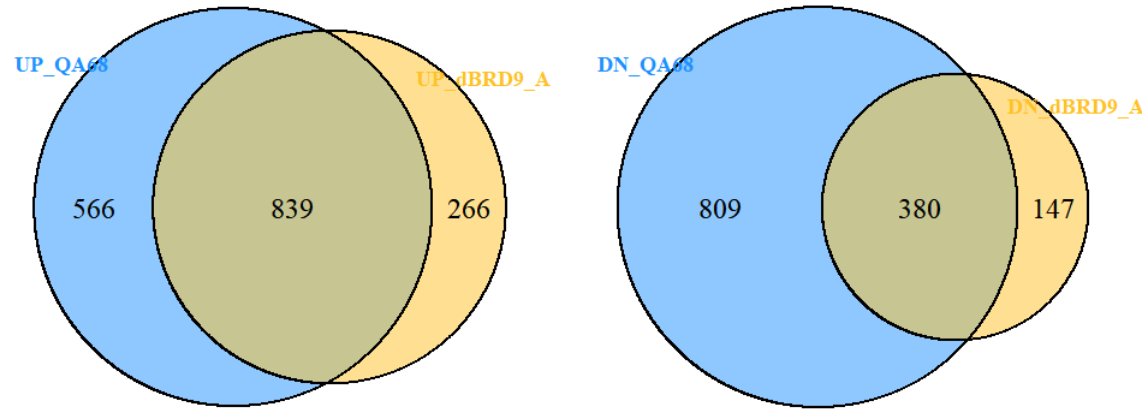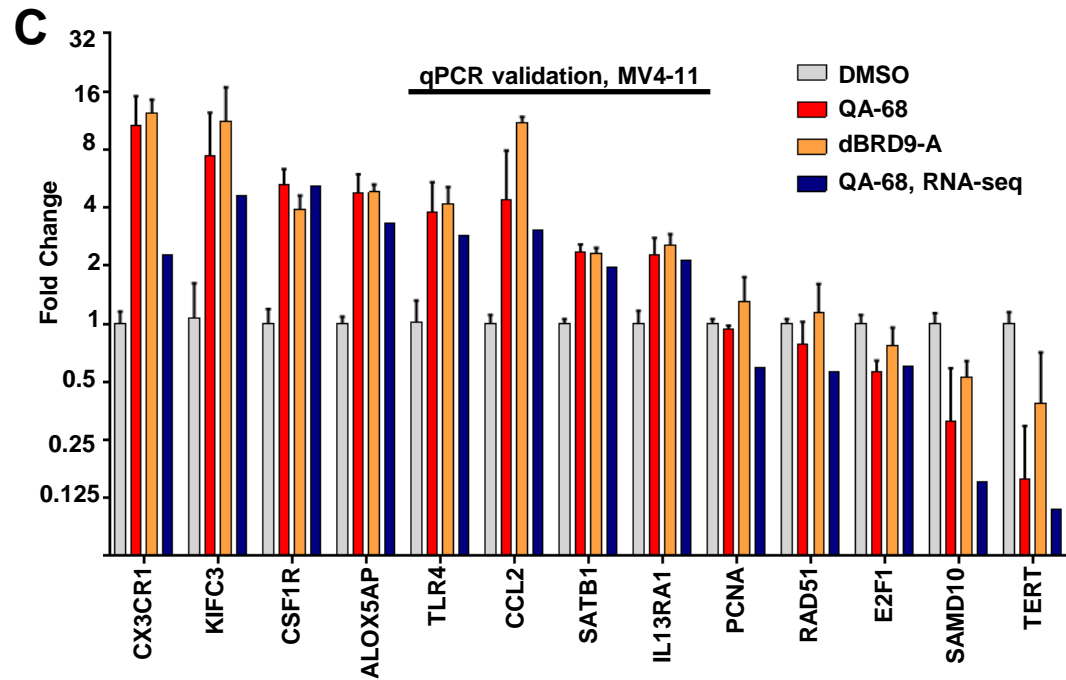

**B** *MV411, dBRD9-A vs DMSO*

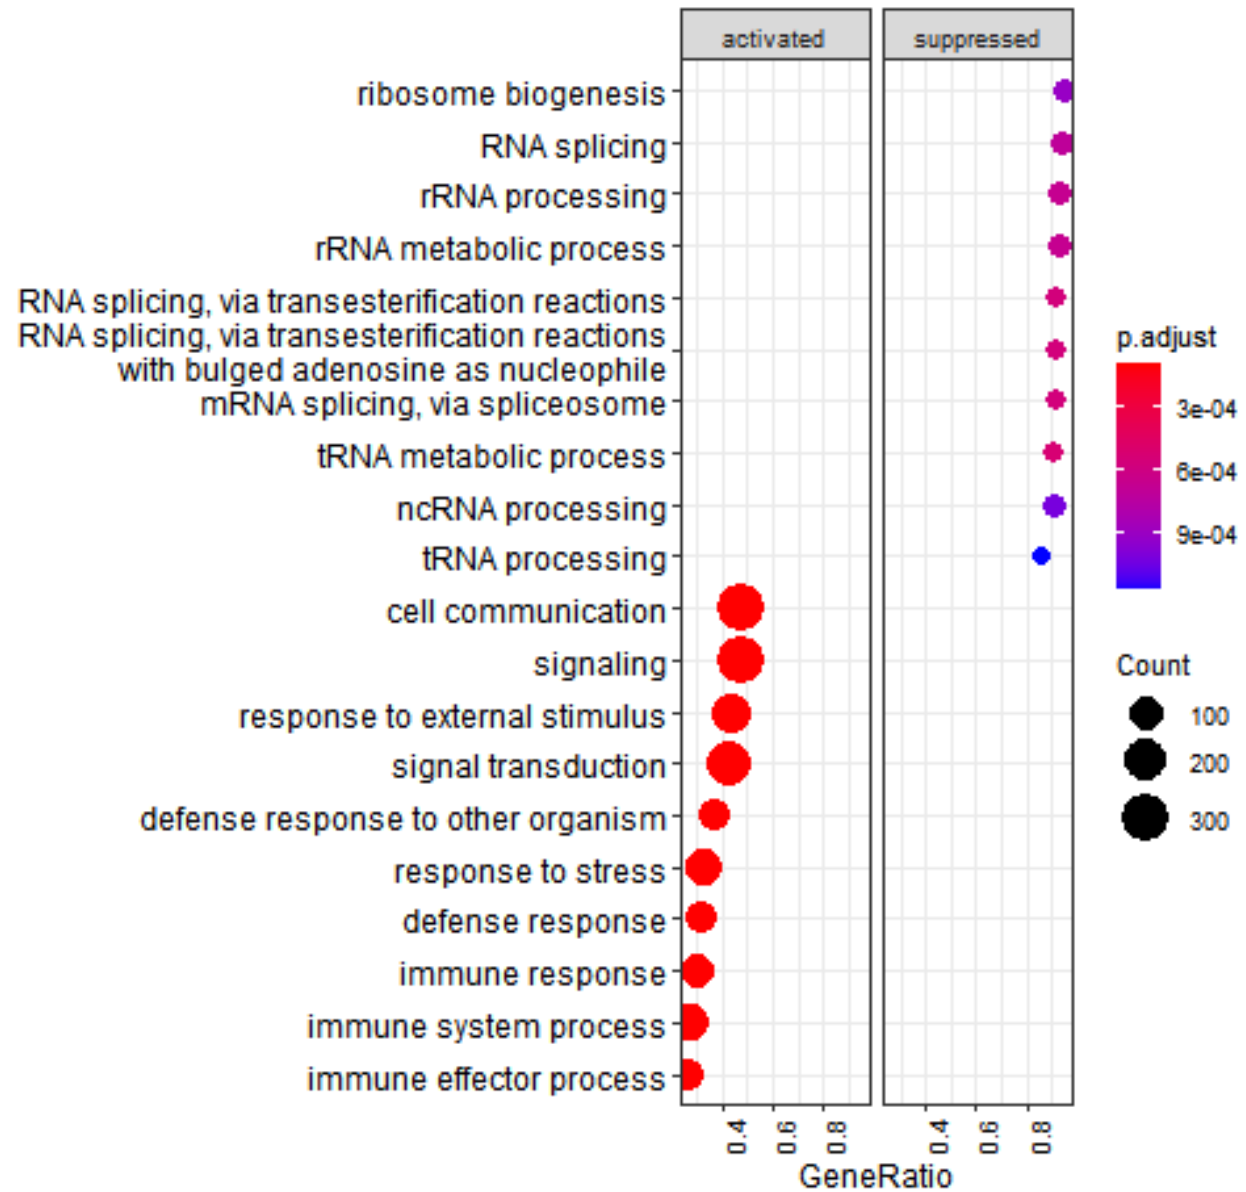

Supplementary Figure 12 (A-C)

**D**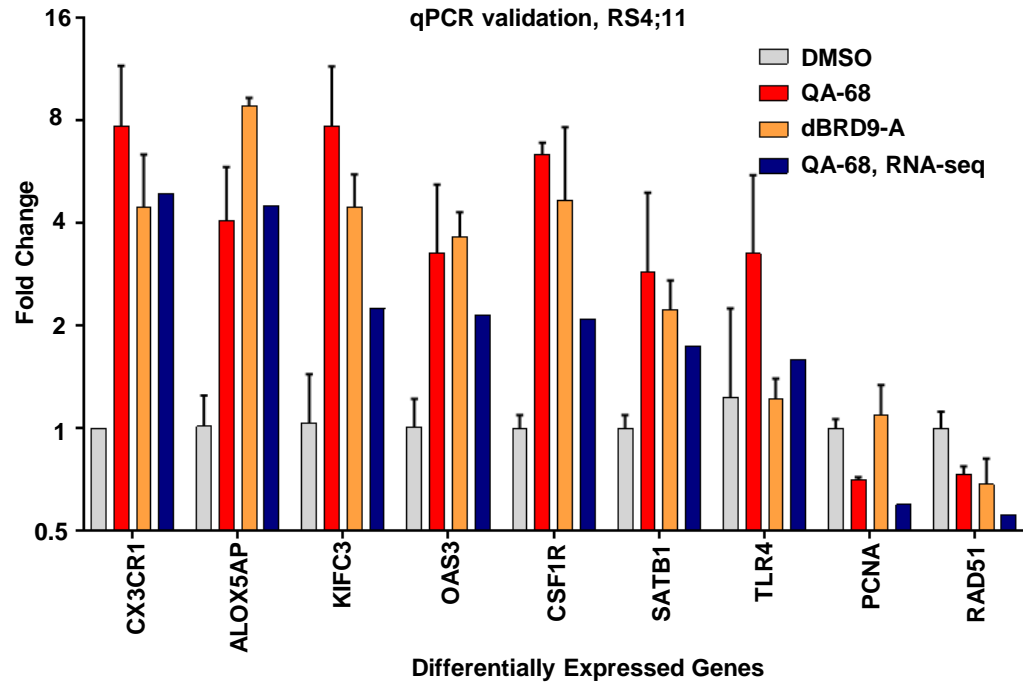**E**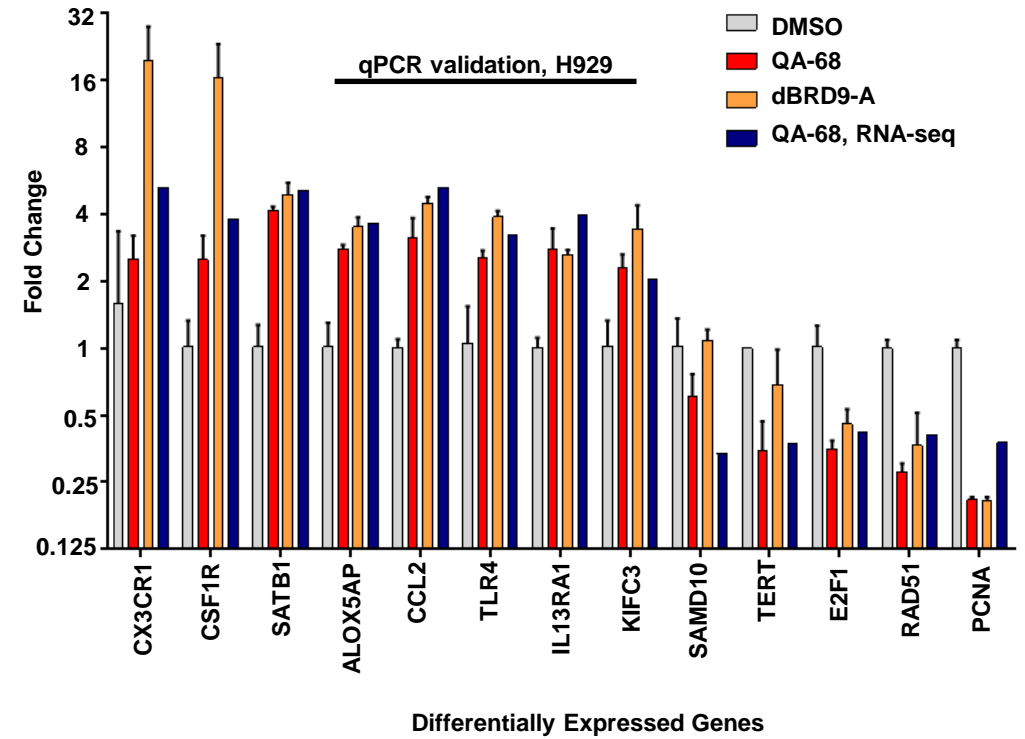

Supplement: 41408_2022_704_MOESM2_ESM.pdf [file 41408_2022_704_MOESM2_ESM.pdf]
